# Supplementary material for: Frataxin mRNA Isoforms in FRDA Patients and Normal Subjects: Effect of Tocotrienol Supplementation
Source: PubMed Central journal article supplement (PMC3794619; doi:10.1155/2013/276808), 2013-09-23
Supplement: 276808.f1.pdf [file 276808.f1.pdf]

**Table 1:** Primer sequence and amplicon length of the genes studied with real-time PCR. Beta-actin and GADPH genes were used for normalization purposes.

| <b>Unigene accession no.</b> | <b>Gene</b>       | <b>Left Primer</b>   | <b>Right Primer</b>     | <b>Amplicon length (bp)</b> |
|------------------------------|-------------------|----------------------|-------------------------|-----------------------------|
| Hs.520640                    | <i>Beta actin</i> | TGTGGCATCCACGAAACTAC | TGATCTTGATCTTCATTGTGCT  | 175                         |
| Hs.544577                    | <i>GADPH</i>      | GGCCTCCAAGGAGTAAGACC | CTGTGAGGAGGGGAGATTCA    | 130                         |
| Hs.20685                     | <i>FXN-1</i>      | GATGTCTCCTTTGGGAGTGG | ACGCTTAGGTCCACTGGATG    | 126                         |
| Hs.20685                     | <i>FXN-2</i>      | GATGTCTCCTTTGGGAGTGG | CGCTTAGGTCCACTACATACCTG | 133                         |
| Hs.20685                     | <i>FXN-3</i>      | CCTTGCAGACAAGCCATACA | CTTCGTTGCTCACTTGCTGA    | 275                         |
| Hs.162646                    | <i>PPARG</i>      | CATAAAGTCCTTCCCGCTGA | ACCTCTTTGCTCTCCTCCTG    | 165                         |
